# Supplementary material for: Glycerol selective oxidation to lactic acid over platinum–vanadium bimetallic catalysts supported on activated carbon
Source: Royal Society of Chemistry journal article supplement (doi:10.1039/d3re00425b), 2023-09-27
Supplement: d3re00425b1.pdf [file d3re00425b1.pdf]

## Supporting Information

### Glycerol selective oxidation to lactic acid over platinum-vanadium bimetallic catalysts supported on activated carbon

Hanumanth Reddy Pemmana, Ramu Reddi, Ramagopal VS Uppaluri, Nageswara Rao Peela\*

Department of Chemical Engineering, Indian Institute of Technology Guwahati, Assam 781039, India

\*Corresponding Author: peelanr@iitg.ac.in

**Table S1: Literature reports on glycerol oxidation to lactic acid process.**

| Catalysts                                  | T (°C) | P (bar)    | Gas Medium     | time (hr) | base | base/gly (mol/mol) | gly/ metal (mol/mol) | conversion (%) | L.A. selectivity (%) | Ref |
|--------------------------------------------|--------|------------|----------------|-----------|------|--------------------|----------------------|----------------|----------------------|-----|
| 1.9Pt-4.7Ru/C                              | 200    | 40         | H <sub>2</sub> | 5         | NaOH | 0.8                | 700                  | 100            | 37                   | 1   |
| 1Au-1Pd/TiO <sub>2</sub>                   | 160    | 10         | O <sub>2</sub> | 2         | BF   | -                  | 2500                 | 29.7           | 58.5                 | 2   |
| 1.5Pt/Sn-MFI                               | 100    | 6.2        | O <sub>2</sub> | 24        | BF   | -                  | 350                  | 89.8           | 80.5                 | 3   |
| 1Au-1Pt/TiO <sub>2</sub>                   | 90     | 1          | O <sub>2</sub> | 1         | NaOH | 4                  | 8000                 | 30             | 86                   | 4   |
| 0.4Au-0.3Pt/CeO <sub>2</sub>               | 100    | 5          | O <sub>2</sub> | 0.5       | NaOH | 4                  | 680                  | 99             | 80                   | 5   |
| 1Pt-1Co/CeO <sub>2</sub>                   | 200    | 10         | N <sub>2</sub> | 4         | NaOH | 1                  | 720                  | 85             | 87.7                 | 6   |
| 0.5Au-0.5Pt/Al <sub>2</sub> O <sub>3</sub> | 85     | 6 (mlpm)   | O <sub>2</sub> | -         | NaOH | 4                  | -                    | >90            | 40                   | 7   |
| 0.5%Cu-1.0%Pt/AC                           | 90     | 100 (mlpm) | O <sub>2</sub> | 4         | LiOH | 1.5                | -                    | 80             | 69.3                 | 8   |
| 10%Ni-1Co/CeO <sub>2</sub>                 | 160    | 20         | N <sub>2</sub> | 6.5       | NaOH | 1.5                | 58.82                | 97             | 95.88                | 9   |
| 1.39Pt-0.5Co/CeO <sub>2</sub>              | 200    | 10         | N <sub>2</sub> | 4         | NaOH | 1                  | -                    | 98             | 54                   | 10  |
| 1Au-0.5Ru/CZ                               | 50     | 3          | O <sub>2</sub> | 0.25      | NaOH | 1                  | 1000                 | 28             | 22                   | 11  |

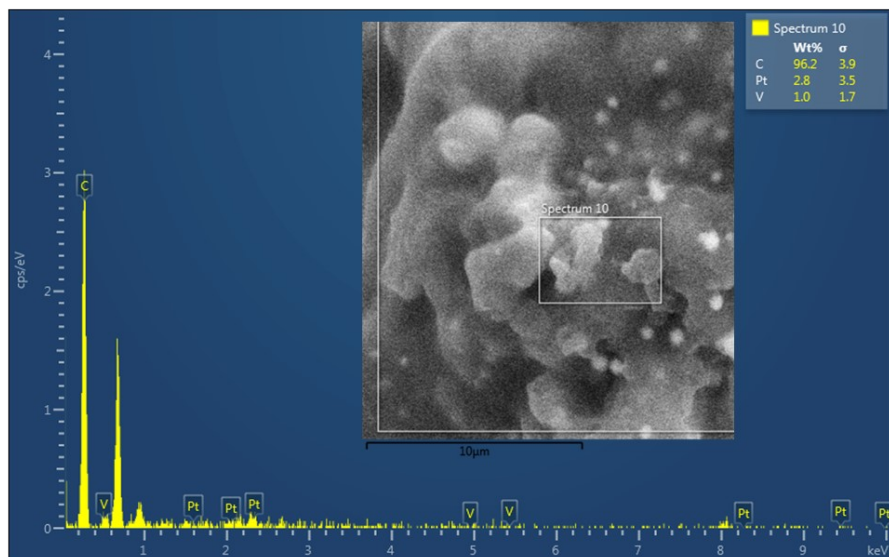

**Figure S1:** EDX spectrum of the 1Pt-1V/AC bimetallic catalyst.

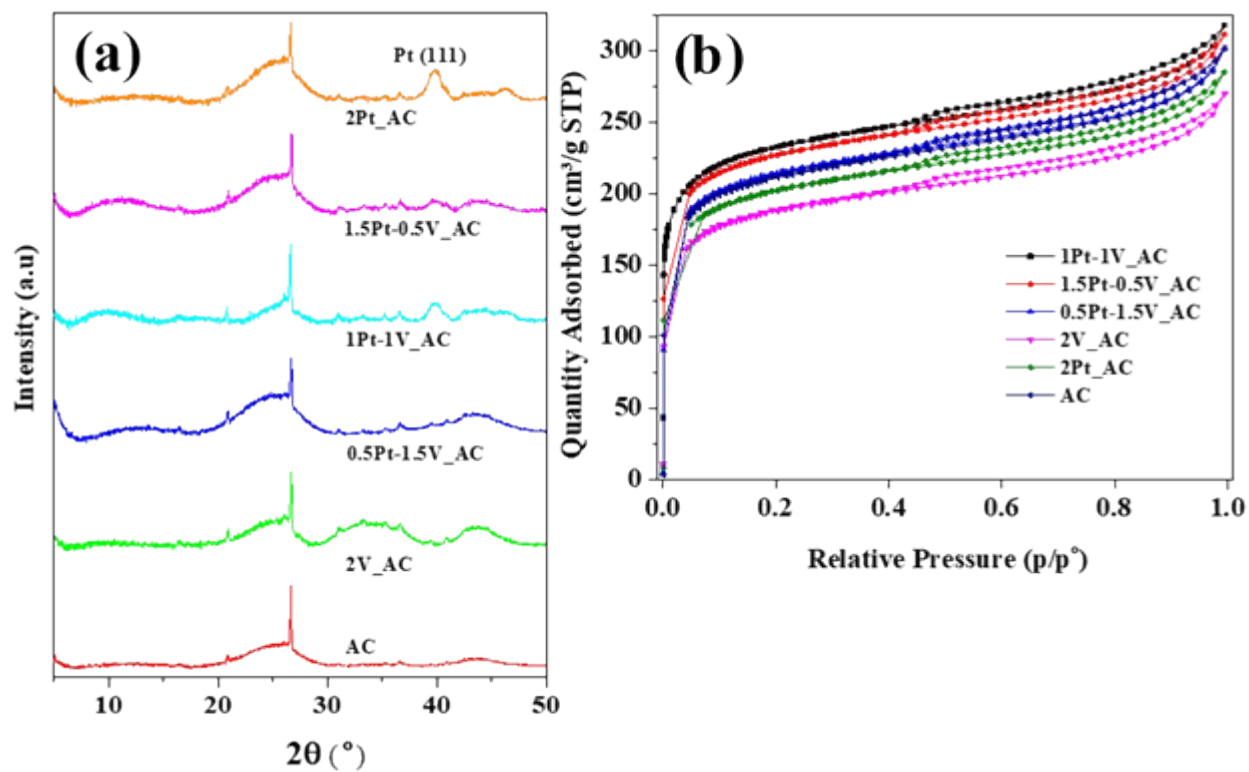

**Figure S2:** (a) XRD patterns (b)  $N_2$  sorption isotherms of various activated carbon supported Pt-V bimetallic catalysts, synthesized in this study. The data for bare activated carbon support also included for the comparison.

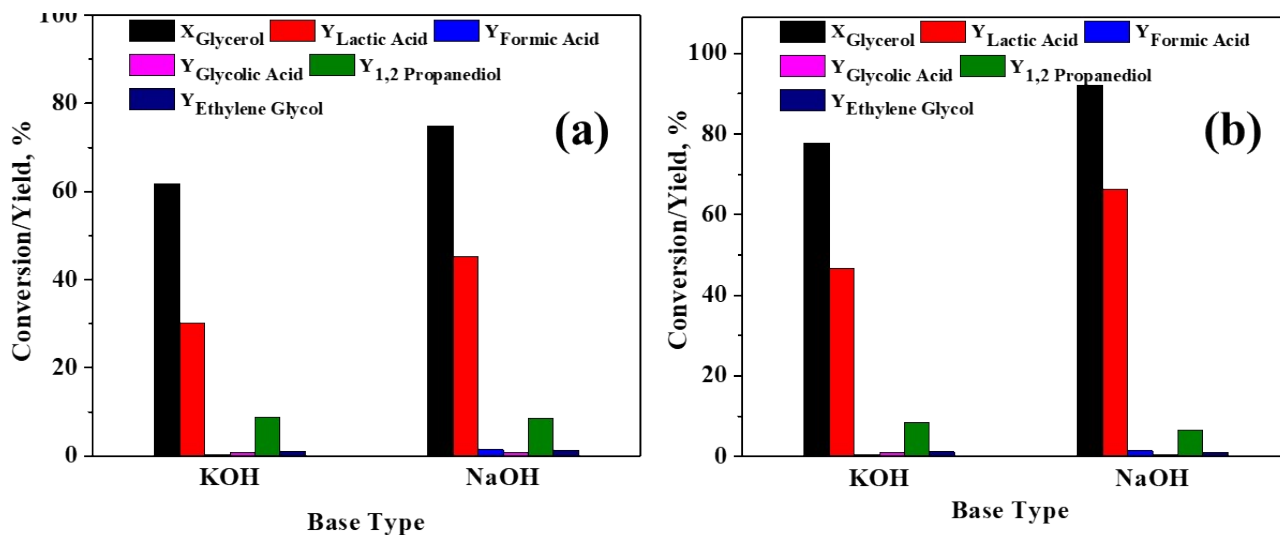

**Figure S3:** Effect of base type on glycerol to lactic acid conversion over 1Pt-1V/AC bimetallic catalyst: (a) 3 h and (b) 12 h . The other reaction conditions: 200 °C temperature, 5 bar air pressure, 1:1 base (KOH or NaOH) to glycerol molar ratio, and 0.05 g catalyst (8800 glycerol to metal molar ratio).

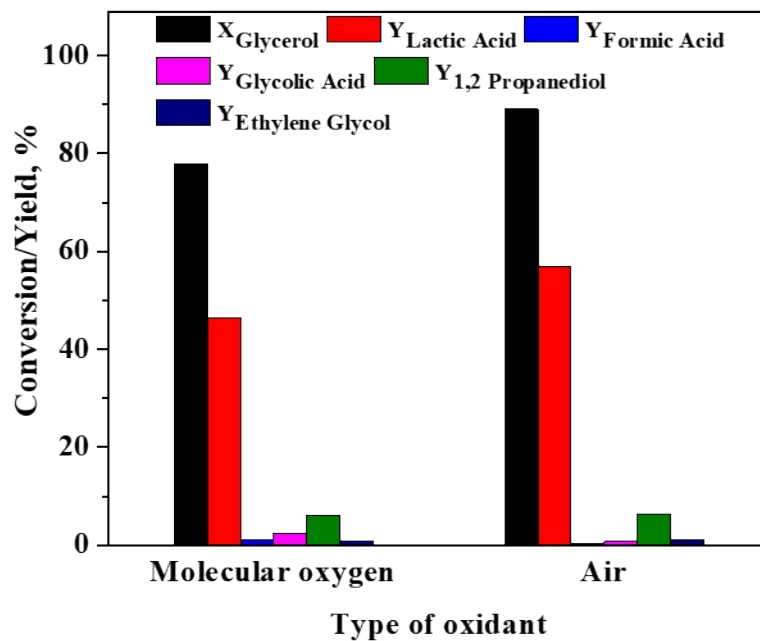

**Figure S4:** Effect of oxidant type on glycerol to lactic acid conversion over 1Pt-11V/AC bimetallic catalyst. (Reaction conditions: 200°C temperature, 5 bar air pressure, 12 h reaction time, 1:1 base (KOH) to glycerol molar ratio, and 0.1 g catalyst.)

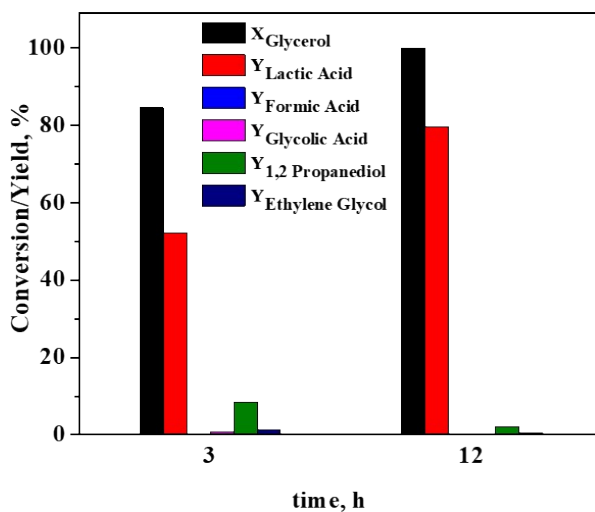

**Figure S5:** Glycerol to lactic acid conversion over 1Pt-1V/AC bimetallic catalyst: Effect of (a) reaction time (with NaOH as a base). The other reaction conditions: 200°C temperature, 5 bar air pressure, 1:1 base (NaOH) to glycerol molar ratio, and 0.1 g catalyst.

With the increase of catalyst loading from 0 to 0.05 (8800 mol/mol glycerol to metal molar ratio) and 0.1 g (4400 mol/mol), the GL conversion and the LA yield was significantly enhanced from 27 to 62.5 and 79.2% and from 5.5 to 31.0 and 41.0%, respectively (Figure. S6). Further, with an increase in the reaction time of 3 to 12 h, the GL conversion and LA yields were increased from 78.7 to 90.0% and 47.7 to 57.7%, respectively (Figure. S7). However, there is no formation of byproducts with a bare (0.0 g) catalyst, which means the process is a hydrothermal conversion. A considerable amount (8.23%) of 1,2-PDO was formed with an increasing catalyst amount to 0.05 and further increasing to 0.1 g; there is no change in 1,2-PDO yield. However, an increase in reaction time from 3 to 12 h showed a slight decrease in 1,2-PDO yield.

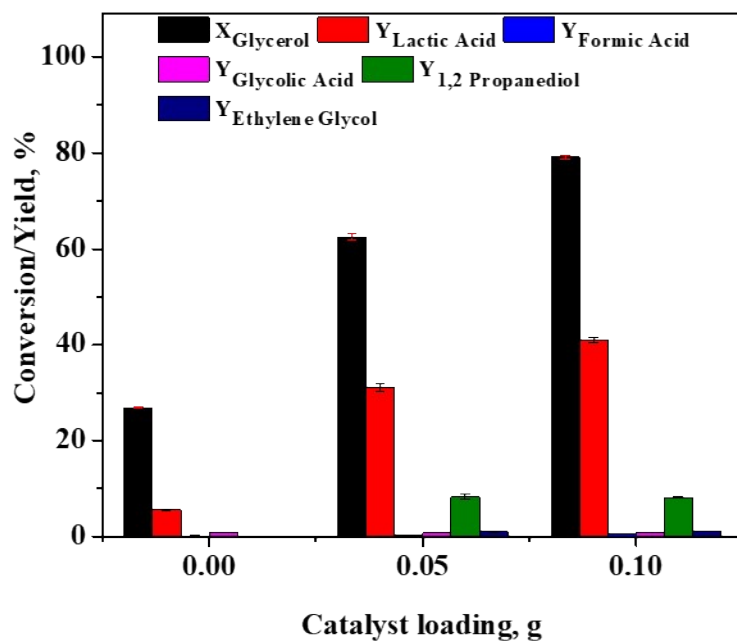

**Figure S6:** Effect of catalyst loading on glycerol to lactic acid conversion over 1Pt-1V/AC bimetallic catalyst (Reaction conditions: 200°C temperature, 5 bar air pressure, 3 h reaction time, and 1:1 base (KOH) to glycerol molar ratio).

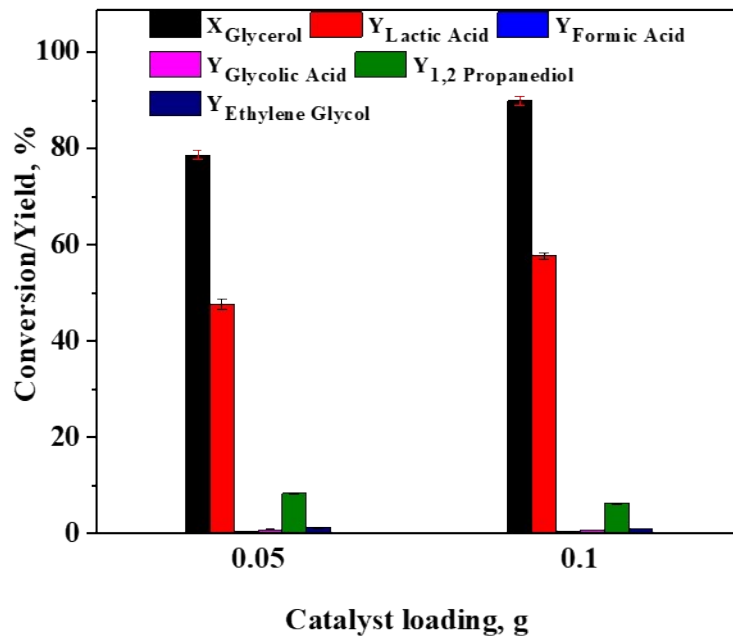

**Figure S7:** Effect of catalyst loading on glycerol to lactic acid conversion over 1Pt-1 V/AC bimetallic catalyst. (Reaction conditions: 200°C temperature, 5 bar air pressure, 12 h reaction time, and 1:1 base (KOH) to glycerol molar ratio).



**Table S2: Carbon balance at various process conditions.**

| S. No | Process Conditions                                                       | CB (%) |
|-------|--------------------------------------------------------------------------|--------|
| 1     | 160, 5 bar air, 12h, KOH/Gly = 1 (mol/mol), Gly/Metal = 4400 (mol/mol)   | 77.36  |
| 2     | 180, 5 bbar air, 12h, KOH/Gly = 1 (mol/mol), Gly/Metal = 4400 (mol/mol)  | 75.05  |
| 3     | 200, 5 bar air, 12h, KOH/Gly = 1 (mol/mol), Gly/Metal = 4400 (mol/mol)   | 78.4   |
| 4     | 200, 5 bar air, 3h, KOH/Gly = 1 (mol/mol), Gly/Metal = 4400 (mol/mol)    | 72.4   |
| 5     | 200, 10 bar air, 3h, KOH/Gly = 1 (mol/mol), Gly/Metal = 4400 (mol/mol)   | 75.53  |
| 6     | 200, 15 bar air, 12h, KOH/Gly = 1 (mol/mol), Gly/Metal = 4400 (mol/mol)  | 72.62  |
| 7     | 200, 5 bar air, 6h, KOH/Gly = 1 (mol/mol), Gly/Metal = 4400 (mol/mol)    | 72.82  |
| 8     | 200, 5 bar air, 12h, Base free, Gly/Metal = 4400 (mol/mol)               | 81.7   |
| 9     | 200, 5 bar air, 12h, KOH/Gly = 0.5 (mol/mol), Gly/Metal = 4400 (mol/mol) | 71.13  |

## References

- (1) Maris, E. P.; Ketchie, W. C.; Murayama, M.; Davis, R. J. Glycerol Hydrogenolysis on Carbon-Supported PtRu and AuRu Bimetallic Catalysts. *Journal of Catalysis*. 2007, pp 281–294. <https://doi.org/10.1016/j.jcat.2007.08.007>.
- (2) Xu, J.; Zhang, H.; Zhao, Y.; Yu, B.; Chen, S.; Li, Y.; Hao, L.; Liu, Z. Selective Oxidation of Glycerol to Lactic Acid under Acidic Conditions Using AuPd/TiO<sub>2</sub> Catalyst. *Green Chemistry*. 2013, pp 1520–1525. <https://doi.org/10.1039/c3gc40314a>.
- (3) Hong Je Cho; Chun-Chih Changa; Wei Fan. Base Free, One-Pot Synthesis of Lactic Acid from Glycerol Using a Bifunctional Pt/Sn-MFI Catalyst. *Green Chemistry* **2014**, 16 (7), 3428–3433. <https://doi.org/10.1039/c4gc00723a>.
- (4) Shen, Y.; Zhang, S.; Li, H.; Ren, Y.; Liu, H. Efficient Synthesis of Lactic Acid by Aerobic Oxidation of Glycerol on Au-Pt/TiO<sub>2</sub> Catalysts. *Chemistry - A European Journal*. 2010, pp 7368–7371. <https://doi.org/10.1002/chem.201000740>.
- (5) Purushothaman, R. K. P.; van Haveren, J.; van Es, D. S.; Melián-Cabrera, I.; Meeldijk, J. D.; Heeres, H. J. An Efficient One Pot Conversion of Glycerol to Lactic Acid Using Bimetallic Gold-Platinum Catalysts on a Nanocrystalline CeO<sub>2</sub> Support. *Appl Catal B* **2014**, 147, 92–100. <https://doi.org/10.1016/j.apcatb.2013.07.068>.
- (6) Zhang, G.; Jin, X.; Guan, Y.; Yin, B.; Chen, X.; Liu, Y.; Feng, X.; Shan, H.; Yang, C. Toward Selective Dehydrogenation of Glycerol to Lactic Acid over Bimetallic Pt-Co/CeO<sub>x</sub> Catalysts. *Ind Eng Chem Res* **2019**, 58 (31), 14548–14558. <https://doi.org/10.1021/ACS.IECR.9B01918>.

- (7) Mimura, N.; Muramatsu, N.; Hiyoshi, N.; Sato, O.; Yamaguchi, A. Continuous Production of Glyceric Acid and Lactic Acid by Catalytic Oxidation of Glycerol over an Au–Pt/Al<sub>2</sub>O<sub>3</sub> Bimetallic Catalyst Using a Liquid-Phase Flow Reactor. *Catalysis Today*. 2020. <https://doi.org/10.1016/j.cattod.2020.03.029>.
- (8) Zhang, C.; Wang, T.; Liu, X.; Ding, Y. Cu-Promoted Pt/Activated Carbon Catalyst for Glycerol Oxidation to Lactic Acid. *J Mol Catal A Chem* **2016**, *424*, 91–97. <https://doi.org/10.1016/J.MOLCATA.2016.08.018>.
- (9) Tang, Z.; Cao, H.; Tao, Y.; Heeres, H. J.; Pescarmona, P. P. Transfer Hydrogenation from Glycerol over a Ni-Co/CeO<sub>2</sub> Catalyst: A Highly Efficient and Sustainable Route to Produce Lactic Acid. *Appl Catal B* **2020**, *263*, 118273. <https://doi.org/10.1016/J.APCATB.2019.118273>.
- (10) Zhang, G.; Jin, X.; Li, X.; Meng, K.; Wang, J.; Zhang, Q.; Chen, X.; Liu, Y.; Feng, X.; Yang, C. Electronic Coupling Enhanced PtCo/CeO<sub>2</sub> Hybrids as Highly Active Catalysts for the Key Dehydrogenation Step in Conversion of Bio-Derived Polyols. *Chem Eng Sci* **2021**, *229*, 116060. <https://doi.org/10.1016/J.CES.2020.116060>.
- (11) Chinchilla, L. E.; Olmos, C. M.; Villa, A.; Carlsson, A.; Prati, L.; Chen, X.; Blanco, G.; Calvino, J. J.; Hungría, A. B. Ru-Modified Au Catalysts Supported on Ceria–Zirconia for the Selective Oxidation of Glycerol. *Catal Today* **2015**, *253*, 178–189. <https://doi.org/10.1016/J.CATTOD.2015.02.030>.
